# Supplementary material for: Functionalization of Violet Phosphorus Quantum Dots with Azo-Containing Star-Shape Polymer for Optically Controllable Memory
Source: MDPI journal article supplement (doi:10.3390/pr11123429), 2023-12-14
Supplement: s1 [file s1]

## Supplementary Information

### **Functionalization of Violet Phosphorus Quantum Dots with Azo-Containing Star-Shape Polymer for Optically Controllable Memory**

*Fan Shu*<sup>1,†</sup>, *Weilin Chen*<sup>1,†</sup>, *Gang Liu*<sup>1,\*</sup>

<sup>1</sup> Department of Micro/Nano Electronics, School of Electronic Information and  
Electrical Engineering, Shanghai Jiao Tong University, Shanghai, 200240, China

\*Correspondence: gang.liu@sjtu.edu.cn

<sup>†</sup> These authors contributed equally to this work.

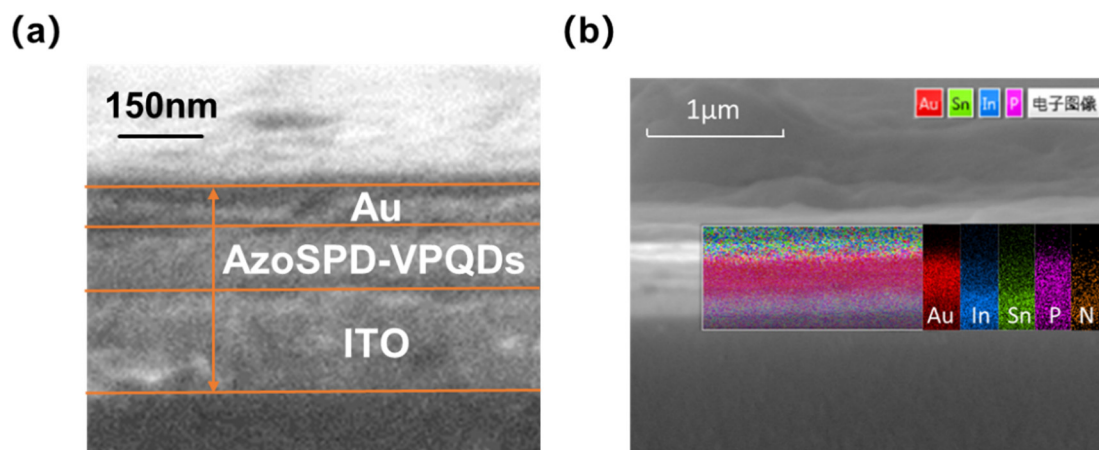

**Figure S1.** (a) The SEM characterization of the device is ITO, AzoSPD-VPQDs, and Au, with thicknesses of 180,120, and 80 nm, respectively. (b) EDS analysis under SEM characterization.

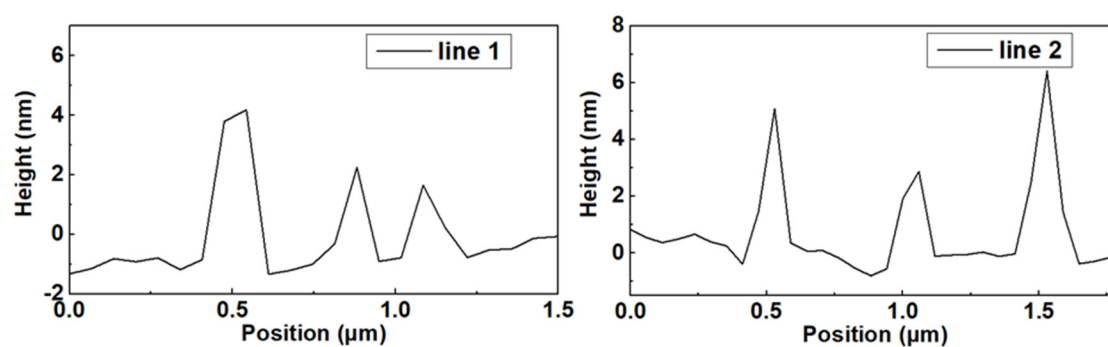

**Figure S2.** The height distribution map of the AFM along the two lines.

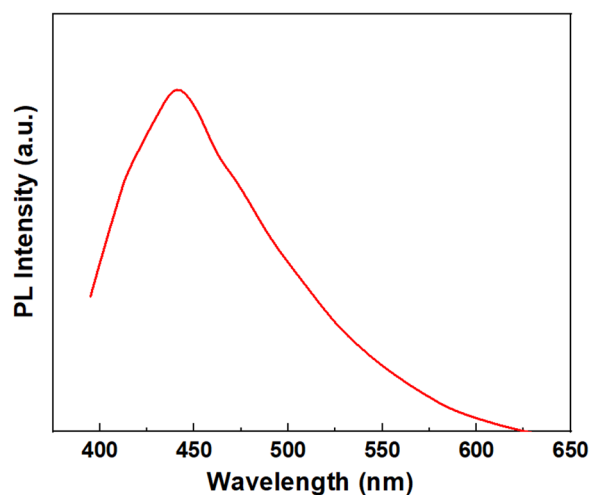

**Figure S3.** The fluorescence emission spectrum of the AzoSPD-VPQDs solution at 360 nm excitation.

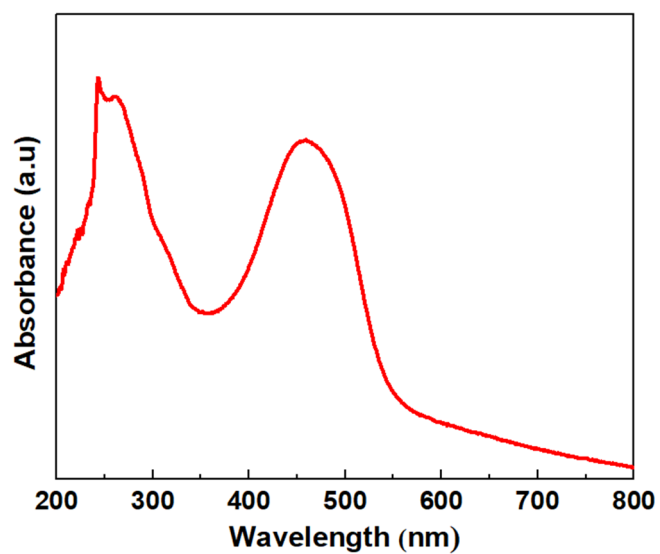

**Figure S4.** UV-Vis spectrum of AzoSPD in the range of 200 ~ 800 nm.

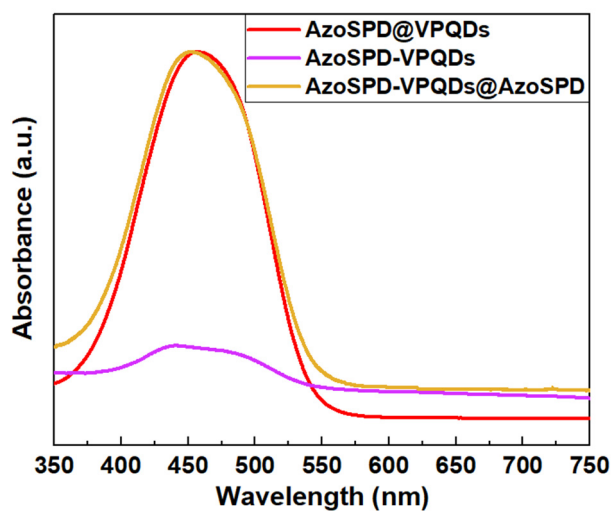

**Figure S5.** UV-Vis contrast diagram of chemical modification and physical mixing. Where '@' represents physical mixing and '-' represents chemical bonding.

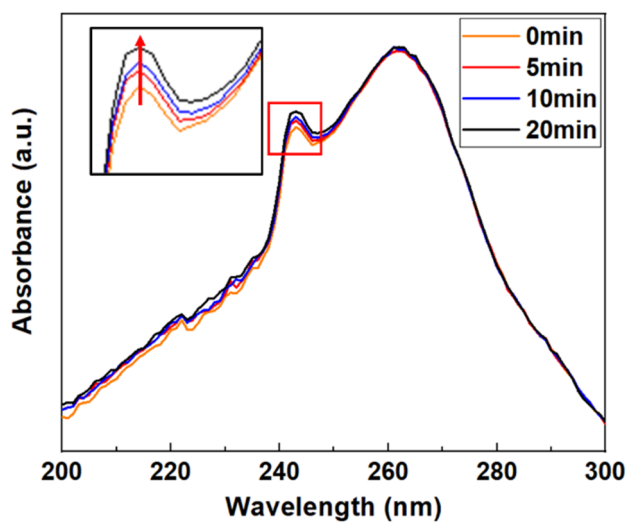

**Figure S6.** The UV-Vis absorption peak intensity of the AzoSPD-VPQDs solution changed with the irradiation time under 465 nm light irradiation (200 ~ 250 nm).

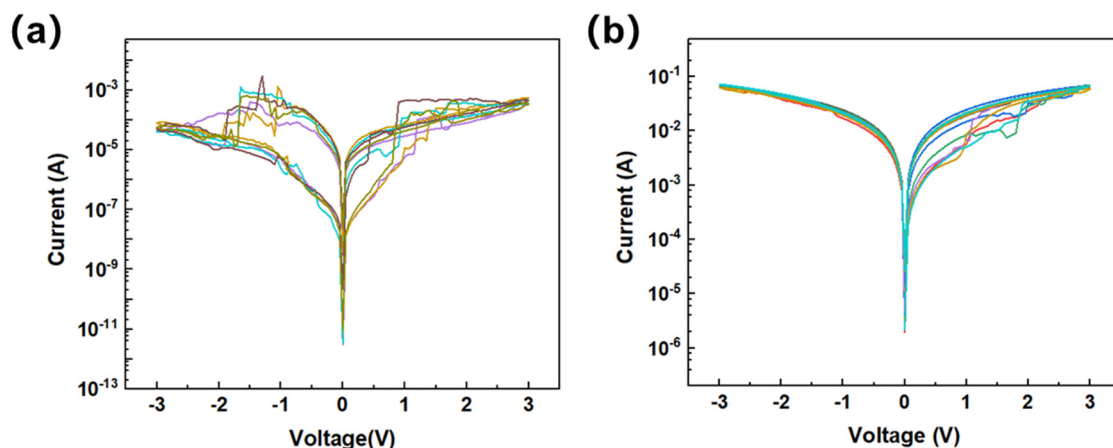

**Figure S7.** The memristive characteristic curve of the control group, (a) Au/AzoSPD/ITO structure device; (b) Au/VPQDs/ITO structure device.

**Table S1.** The performance of this work compared with some QDs memristors.

| Device Structure                  | SET/RESET Voltage [V] | Switching Ratio    | Endurance (Loop) | Switching Power (W)     | Multimodal Control       |
|-----------------------------------|-----------------------|--------------------|------------------|-------------------------|--------------------------|
| Au/PDDF-g-BP/ITO <sup>1</sup>     | -2.34/1.95            | $10^4$             | 600              | $10^{-10} \sim 10^{-2}$ | No                       |
| Ag/GQDs:GO/ITO <sup>2</sup>       | -0.43/0.43            | $>10^3$            | $>500$           | $10^{-5} \sim 10^{-2}$  | No                       |
| BPQDs/PVA <sup>3</sup>            | -4/4                  | 122                | -                | $10^{-5} \sim 10^{-3}$  | Temperature and humidity |
| Ag/(InP/ZnS) QDs/ITO <sup>4</sup> | -0.86/1.27            | $1.85 \times 10^2$ | -                | $10^{-6} \sim 10^{-4}$  | UV light                 |
| Ag/N-GOQDs/Pt <sup>5</sup>        | -0.1/0.22             | $10^7$             | 50               | $10^{-10} \sim 10^{-3}$ | Alternating current      |
| Ag/N-GOQDs/Pt <sup>6</sup>        | -0.25                 | $10^6$             | 30               | $10^{-10} \sim 10^{-4}$ | UV light                 |
| Au/AzoSPD-VPQDs/ITO (This work)   | -1.52/1.75            | $2 \times 10^3$    | 90               | $10^{-8} \sim 10^{-5}$  | UV light                 |

## Reference

- (1) Cao, Y.; Zhang, B.; Tian, X.; Gu, M.; Chen, Y. Direct Covalent Modification of Black Phosphorus Quantum Dots with Conjugated Polymers for Information Storage. *Nanoscale* **2019**, *11* (8), 3527–3533. <https://doi.org/10.1039/C8NR09711A>.
- (2) Ren, S.; Li, Z.; Liu, X.; Li, Y.; Cao, G.; Zhao, J. Oxygen Migration Induced Effective Magnetic and Resistive Switching Boosted by Graphene Quantum Dots. *Journal of Alloys and Compounds* **2021**, *863*, 158339. <https://doi.org/10.1016/j.jallcom.2020.158339>.
- (3) Bokka, N.; Adepur, V.; Selamneni, V.; Sahatiya, P. Non-Contact, Controlled and Moisture Triggered Black Phosphorus Quantum Dots/PVA Film for Transient Electronics Applications. *Materials Letters* **2021**, *290*, 129477. <https://doi.org/10.1016/j.matlet.2021.129477>.
- (4) Wang, J.; Lv, Z.; Xing, X.; Li, X.; Wang, Y.; Chen, M.; Pang, G.; Qian, F.; Zhou, Y.; Han,

S.-T. Optically Modulated Threshold Switching in Core–Shell Quantum Dot Based Memristive Device. *Advanced Functional Materials* **2020**, 30 (16), 1909114. <https://doi.org/10.1002/adfm.201909114>.

- (5) Sokolov, A. S.; Ali, M.; Riaz, R.; Abbas, Y.; Ko, M. J.; Choi, C. Silver-Adapted Diffusive Memristor Based on Organic Nitrogen-Doped Graphene Oxide Quantum Dots (N-GOQDs) for Artificial Biosynapse Applications. *Advanced Functional Materials* **2019**, 29 (18), 1807504. <https://doi.org/10.1002/adfm.201807504>.
- (6) Ali, M.; Sokolov, A.; Ko, M. J.; Choi, C. Optically Excited Threshold Switching Synapse Characteristics on Nitrogen-Doped Graphene Oxide Quantum Dots (N-GOQDs). *J Alloy Compd* **2021**, 855, 157514. <https://doi.org/10.1016/j.jallcom.2020.157514>.
